# Supplementary material for: Comment on Shear wave reflection seismic yields subsurface dissolution and subrosion patterns: application to the Ghor Al-Haditha sinkhole site, Dead Sea, Jordan by Polom et al. (2018)
Source: Copernicus journal article supplement (doi:10.5194/se-2019-132), 2019-10-15
Supplement: Supplementary file [file se-2019-132-AC1-supplement.pdf]

## Discussion 1.

**Polom et al. write:** Fig 1 is not the original as stated in the caption. It is a free modified version of the original (see scan of the original figure 3-4 of El-Isa et al. (1995) attached). A similar figure was already published by Salameh and El-Naser (2000), therein Fig 6. (Salameh, E., and El-Naser, H., The Interface Configuration of Fresh-/Dead Sea Water - Theory and Measurements, Acta Hydrochemica et Hydrobiologica 2000; 28(6); 323-328)

**M. Ezersky et al. response:** In the caption to Fig. 1 of the "Comment" has been stated "Hydrogeological section from El-Isa et al. (1995, Fig. 3-4, herein). *The section is published for the first time*". The presented section is slightly improved in order to specify details, captions, etc. It is not modified. One can compare the discussed sections in Fig. 1a and Fig. 1b.

Correspondingly, section published in Salameh and El-Naser (2000, Fig. 6 herein). We present this section in Fig. 1c. A caption to this figure is "*Fig. 6: Geoelectric-geologic-hydrogeologic cross-section; 1 km North of Wadi Ibn Hanunad confluence into the Dead Sea. Geoelektrischer-geologischer-hydrogeologischer Querschnitt, 1 km nördlich der Mündung des Wadi Ibn Hammad in das Tote Meer*". Any reference to section from El-Isa et al. (1995) is absent (compare Fig. 1a and 1c). Moreover, the same section was presented in the PhD Thesis of D. Closson (2005, Fig. 15 herein) with reference to Salameh and El-Naser (2000). However, we can agree to delete a phrase "*The section is published for the first time*".

Thus, caption to Fig. 1 will be: **Figure 1. Hydrogeological section from El-Isa et al. (1995, Fig. 3-4, herein)"**

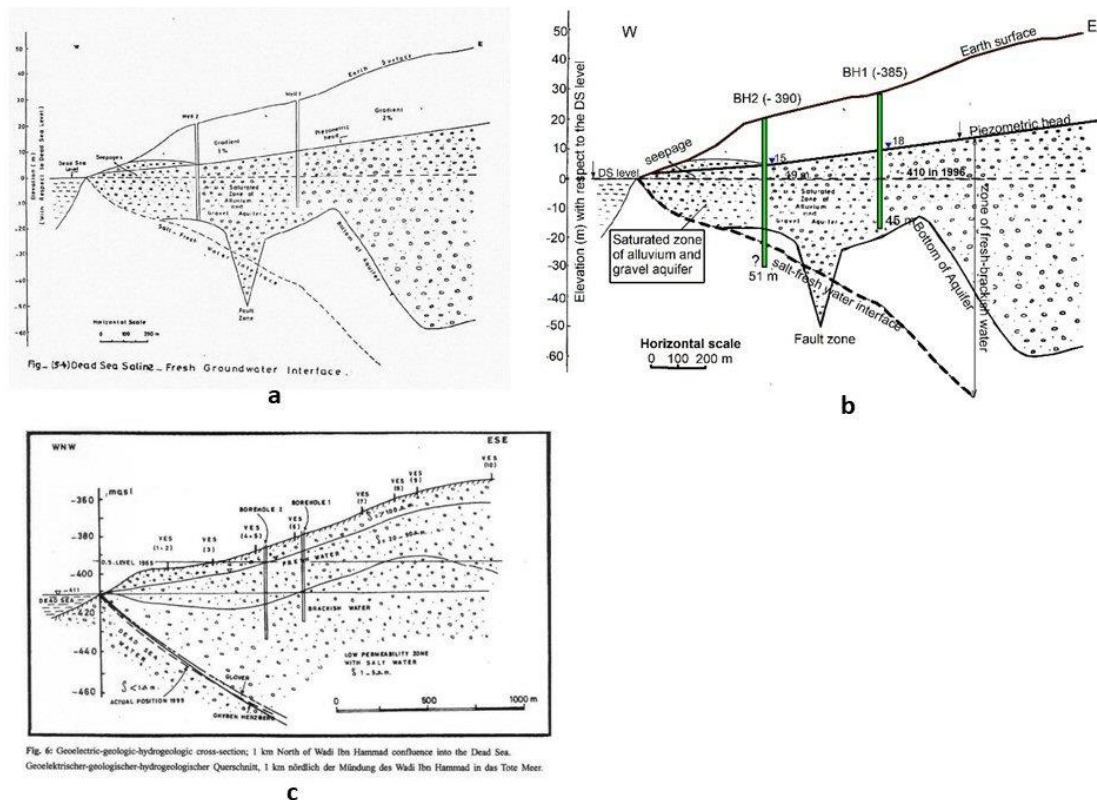

Figure 1. Discussion, 3 sections: (a) Fig. 3-4 From El-Isa et al. 1995, (b) Fig. 1 from "Comment" Ezersky et al., 2019; (c) Fig. 6 from Salameh and El-Naser, 2000

**U. Polom et al. write:** Fig 2a is not compiled by the authors as stated in the caption. It is a slightly modified copy of Fig 1 of Polom et al. (2018).

**M. Ezersky et al. response:** We can agree to change this caption:

**"Figure 2. Geophysical lines layouts in the Ghor Al-Haditha area (Jordan). (a) Previous seismic line location; (b) location of the seismic 75 reflection lines of Polom et al. (2018). Solid blue line is the eastern salt border suggested by Ezersky et al. (2013b). Map (a) is slightly modified copy of Fig. 1 from Polom et al. (2018), map (b) is compiled on the base of Fig. 4 from Polom et al. (2018). Coordinates are in m, Universal Transverse Mercator grid"**

We thank Dr. U. Polom for the fruitful discussion
